# Supplementary material for: Rapid and selective detection of fluoride in aqueous solution by a new hemicyanine-based colorimetric and fluorescent chemodosimeter
Source: Royal Society of Chemistry journal article supplement (doi:10.1039/c3ra42613k), 2013-01-01
Supplement: c3ra42613k.pdf [file c3ra42613k.pdf]

## Electronic Supporting Information (ESI) for

---

### Rapid and selective detection of fluoride in aqueous solution by a new hemicyanine-based colorimetric and fluorescent chemodosimeter

Shengjun Yang,<sup>‡</sup> Yao Liu<sup>‡</sup> and Guoqiang Feng\*

*Key Laboratory of Pesticide and Chemical Biology of Ministry of Education, College of Chemistry,  
Central China Normal University, Wuhan 430079, P.R. China,*

[gf256@mail.ccnu.edu.cn](mailto:gf256@mail.ccnu.edu.cn)

#### Synthesis of 4-(*tert*-butyldiphenylsilyloxy)benzaldehyde **4**

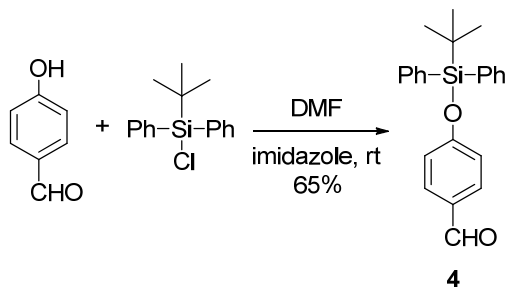

Compound **4** was prepared according to a previously published procedure<sup>1</sup>: to a solution of *p*-hydroxybenzaldehyde (1.22 g, 10 mmol) and imidazole (816 mg, 12 mmol) in dry DMF (20 mL), *tert*-butylchlorodiphenylsilane (2.75 g, 10 mmol) was dropped under ice-water bath. After stirring 12 h at room temperature, the volatiles were evaporated under reduced pressure to oil. The residue was purified by flash chromatography (silica gel column) using petroleum ether and ethyl acetate (v/v = 10/1) to afford **4** as a white solid in 65% yield. Mp: 94-97°C; <sup>1</sup>H NMR (400 MHz, CDCl<sub>3</sub>): 1.11 (9H, s, *t*-Bu), 6.86 (2H, t, ArH), 7.36-7.46 (6H, m, ArH), 7.63-7.71 (6H, m, ArH), 7.41 (2H, s, ArH), 9.80 (1H, s, CHO). <sup>13</sup>C NMR (100 MHz, CDCl<sub>3</sub>): 19.4,

26.3, 120.2, 127.9, 130.2, 131.7, 131.8, 135.3, 161.1, 190.8. IR (KBr,  $\text{cm}^{-1}$ ): 2951, 2857, 1696, 1599, 1511, 1276, 1163, 1114, 904, 746; MS (EI): Calcd for  $\text{C}_{23}\text{H}_{24}\text{O}_2\text{Si}^+$  ( $\text{M}^+$ ) 360.15; Found 360.03.

### Synthesis of compound **5**

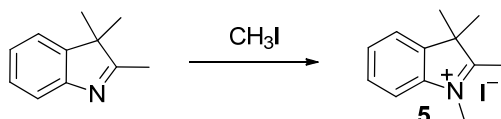

Compound **5** was prepared as a light purple solid from 2,3,3-trimethylindolenine and iodomethane by a previously reported method.<sup>2</sup> Mp:  $> 300^\circ\text{C}$ .  $^1\text{H}$  NMR (600 MHz,  $\text{DMSO-d}_6$ ): 1.53 (6H, s,  $2\text{CH}_3$ ), 2.80 (3H, s,  $\text{CH}_3$ ), 3.99 (3H, s,  $\text{CH}_3$ ), 7.61 (2H, m, ArH), 7.84 (1H, t,  $J = 6.0$  Hz, ArH), 7.92 (1H, t, ArH);  $^{13}\text{C}$  NMR (150 MHz,  $\text{DMSO-d}_6$ ): 196.0, 142.1, 141.6, 129.3, 128.8, 123.4, 115.2, 54.0, 35.0, 21.7, 14.5; IR (KBr,  $\text{cm}^{-1}$ ): 3448, 2964, 1630, 1608, 1481, 1457, 1020, 778; MS (EI): Calcd for  $\text{C}_{12}\text{H}_{16}\text{N}^+ [\text{M} - \text{I}]^+$  174.13; Found 173.14.

### Synthesis of the reference sample of **2**

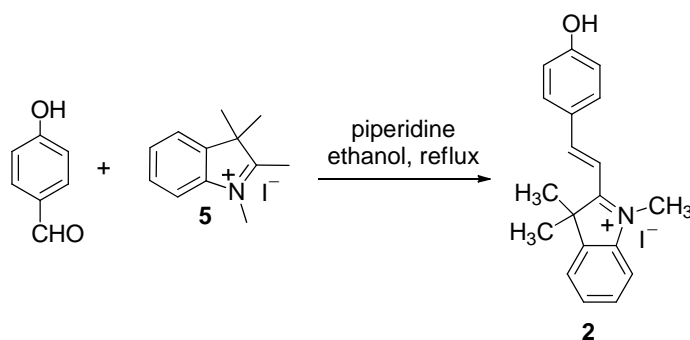

The reference sample of **2** was prepared according to a previously published procedure.<sup>3</sup> To a solution of **5** (301 mg, 1 mmol) in ethanol (10 mL), 4-hydroxybenzaldehyde (122 mg, 1 mmol) and piperidine (10  $\mu\text{L}$ ) was added. The reaction mixture was heated to reflux for 1 h with stirring and then cooled to room temperature. A red solid precipitated and filtered to give the desired product in 58% yield. Mp:  $255\text{--}257^\circ\text{C}$ .  $^1\text{H}$  NMR (400 MHz,  $\text{DMSO-d}_6$ ): 1.77 (6H, s,  $2\text{CH}_3$ ), 4.08 (3H, s,  $\text{NCH}_3$ ), 6.96 (2H, d,  $J = 8.4$  Hz, ArH), 7.46 (1H, d,  $J = 16$  Hz, CH), 7.59 (2H, t,  $J = 7.6$  Hz, ArH), 7.84 (2H, d,  $J = 7.2$  Hz, ArH), 8.12 (2H, d,  $J = 8.0$  Hz, ArH), 8.36 (1H,

d,  $J = 16$  Hz, CH), 10.85 (1H, s, OH).  $^{13}\text{C}$  NMR (100 MHz, DMSO- $\text{d}_6$ ): 181.3, 163.1, 153.6, 143.1, 141.8, 133.6, 128.8, 125.9, 122.7, 116.3, 114.6, 109.3, 51.7, 34.3, 25.7. MS (EI): Calcd. for  $\text{C}_{19}\text{H}_{20}\text{NO}$  [ $\text{M} - \text{H}$ ] 277.36; Found 277.28.

#### References:

1. B. Zhu, F. Yuan, R. Li, Y. Li, Q. Wei, Z. Ma, B. Du and X. Zhang, *Chem. Commun.*, 2011, **47**, 7098.
2. Y. Ueno, J. Jose, A. Loudet, C. Pérez-Bolívar, P. Anzenbacher, Jr. and K. Burgess, *J. Am. Chem. Soc.*, 2011, **133**, 51.
3. S.-P. Wang, W.-J. Deng, D. Sun, M. Yan, H. Zheng and J.-G. Xu, *Org. Biomol. Chem.*, 2009, **7**, 4017.

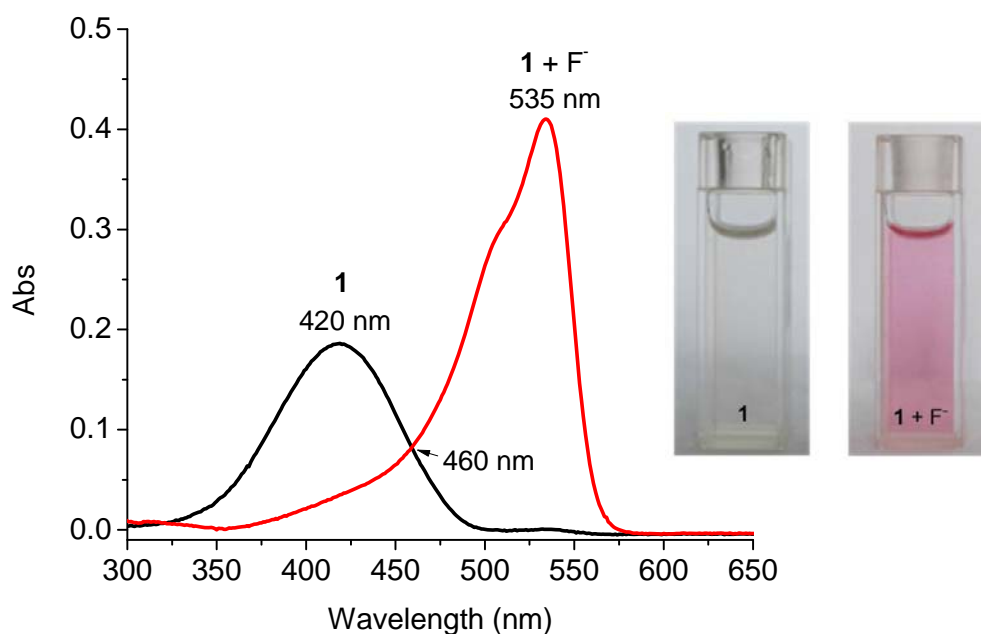

**Fig. S1** Absorption and colour changes of chemodosimeter **1** ( $5\ \mu\text{M}$ ) upon addition of  $\text{F}^-$  (40 mM) in PBS (20 mM, pH 7.4) solution (ethanol/water = 3/7, v/v) at  $25^\circ\text{C}$ . The UV-vis spectrum (red line) was obtained 5 min after  $\text{F}^-$  addition.

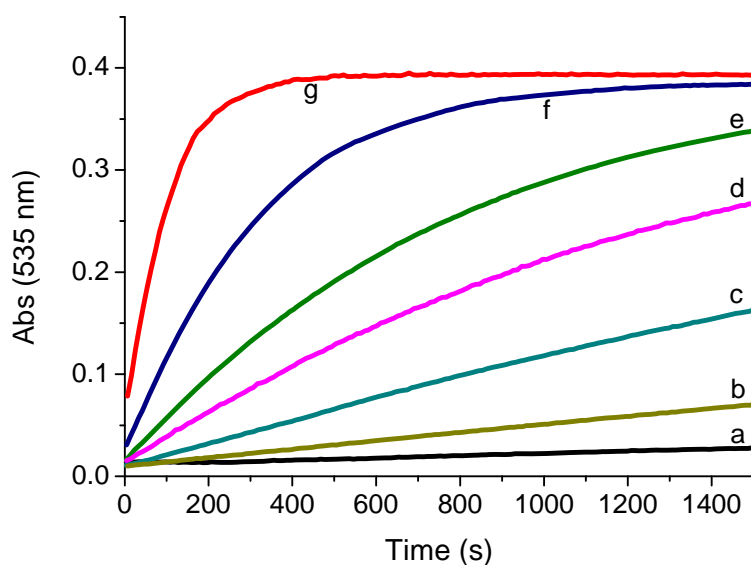

**Fig. S2** Time-dependent of absorption kinetics spectra of chemodosimeter **1** ( $5\ \mu\text{M}$ ) upon addition of different concentrations of  $\text{F}^-$  in PBS (20 mM, pH 7.4) solution (ethanol/water = 3/7, v/v) at  $25^\circ\text{C}$ . The reaction is monitored at 535 nm.  $[\text{F}^-]$  from a to g: 0, 0.1, 0.5, 1, 2, 6 and 20 mM, respectively.

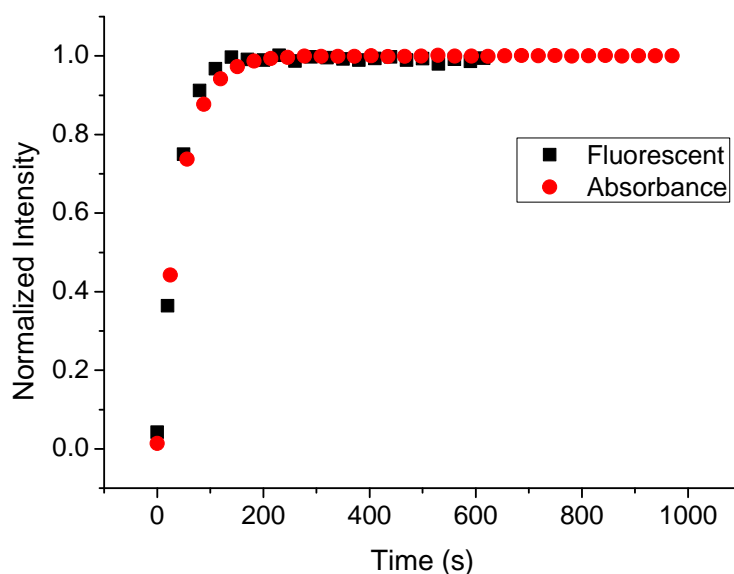

**Fig. S3** A comparison of kinetics of chemodosimeter **1** ( $5\ \mu\text{M}$ ) upon addition of 40 mM  $\text{F}^-$  in PBS (20 mM, pH 7.4) solution (ethanol/water = 3/7, v/v) at  $25^\circ\text{C}$  measured by absorbance intensity changes at 535 nm (●) and fluorescent intensity changes at 558 nm (■). Both absorbance intensity and fluorescent intensity are normalized to make a clear comparison.

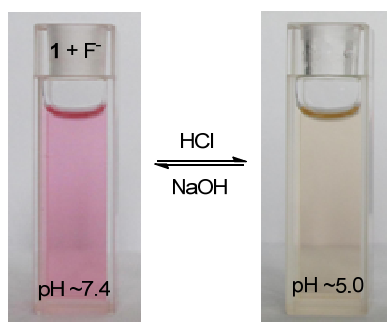

**Fig. S4** The reversible colour changes of the reaction mixture (**1** + F<sup>−</sup>) upon subsequent addition of HCl acid and aqueous NaOH.

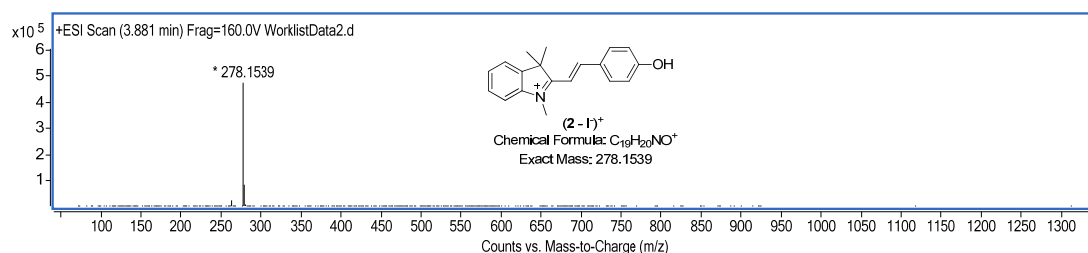

**Fig. S5** HR-MS spectrum of the reaction product of chemodosimeter **1** with F<sup>−</sup>

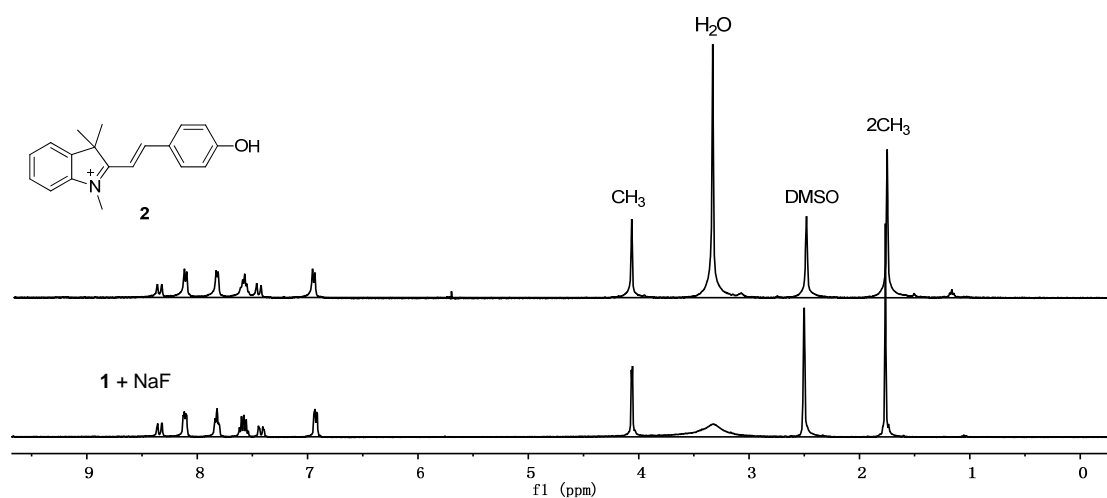

**Fig. S6** Comparison of the <sup>1</sup>H NMR spectra between the reference sample of **2** and the reaction product of chemodosimeter **1** with F<sup>−</sup>.

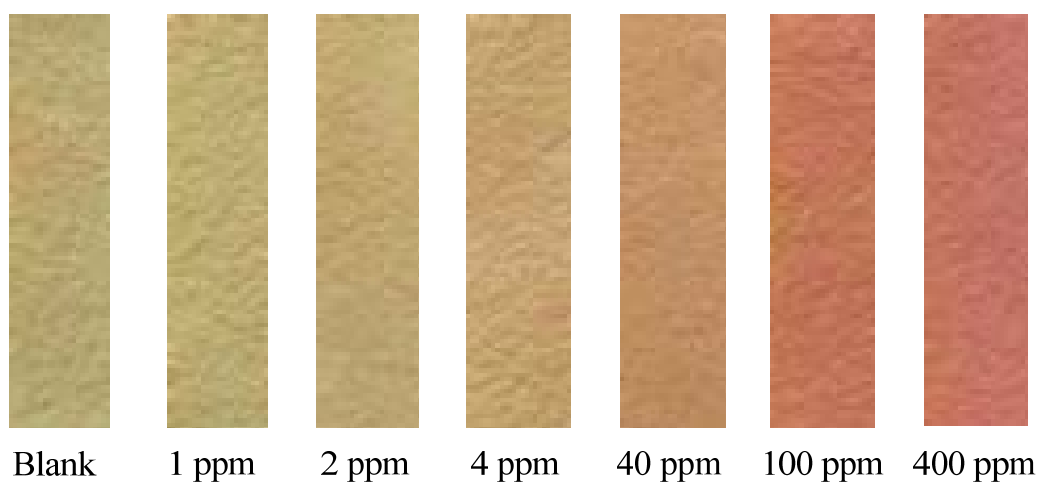

**Fig. S7** Colour changes of test paper containing chemodosimeter **1** with different concentration of  $F^-$  in water.

**NMR and MS spectra for the following compounds:**

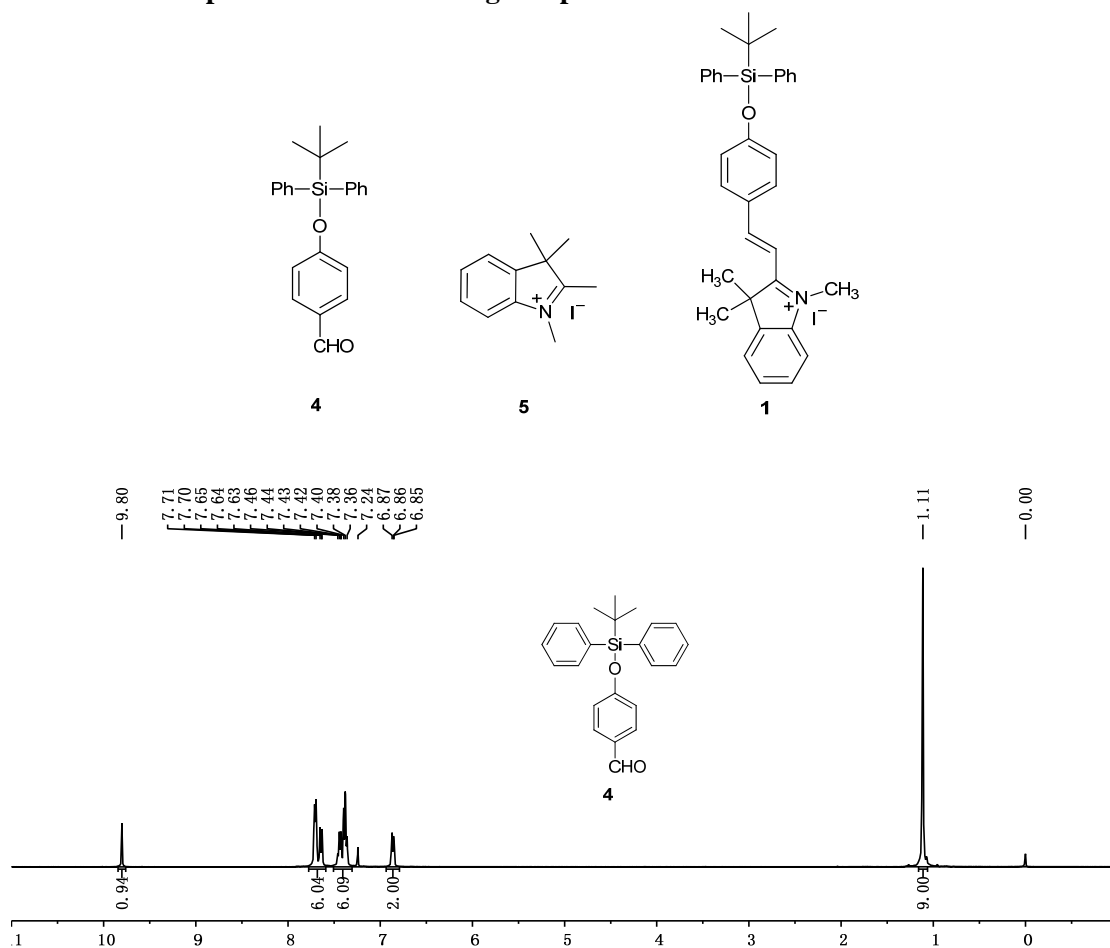

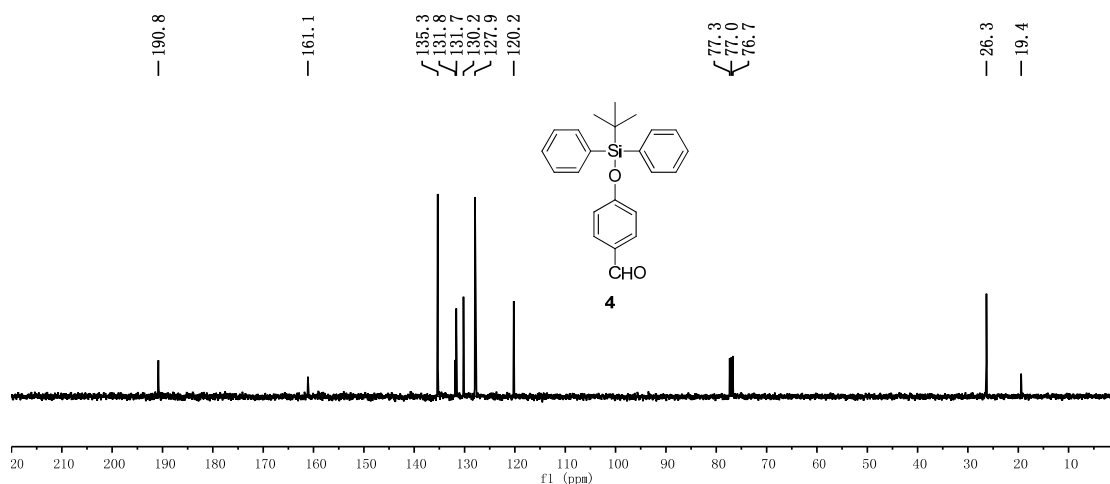

Fig. S8  $^1\text{H}$  NMR and  $^{13}\text{C}$  NMR spectra of compound **4** recorded in  $\text{CDCl}_3$ .

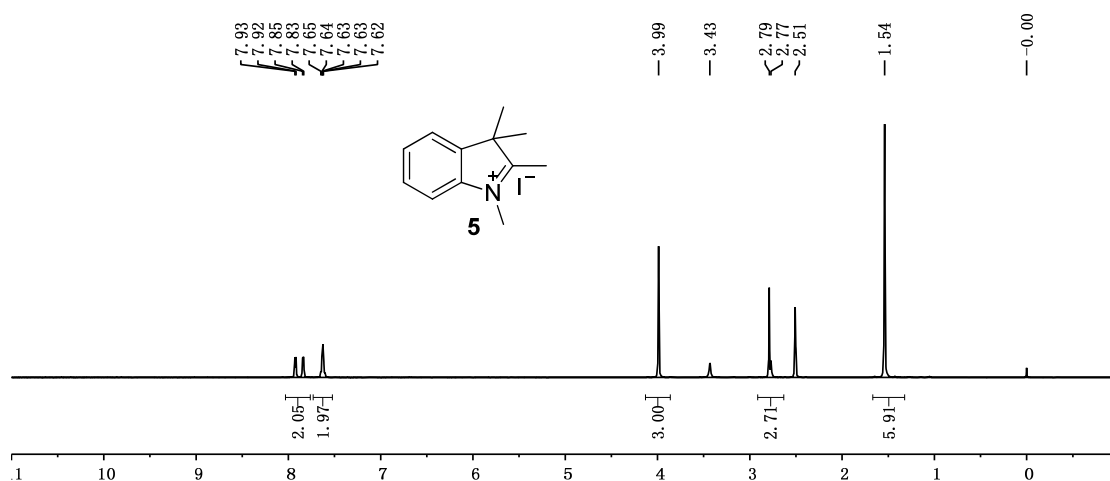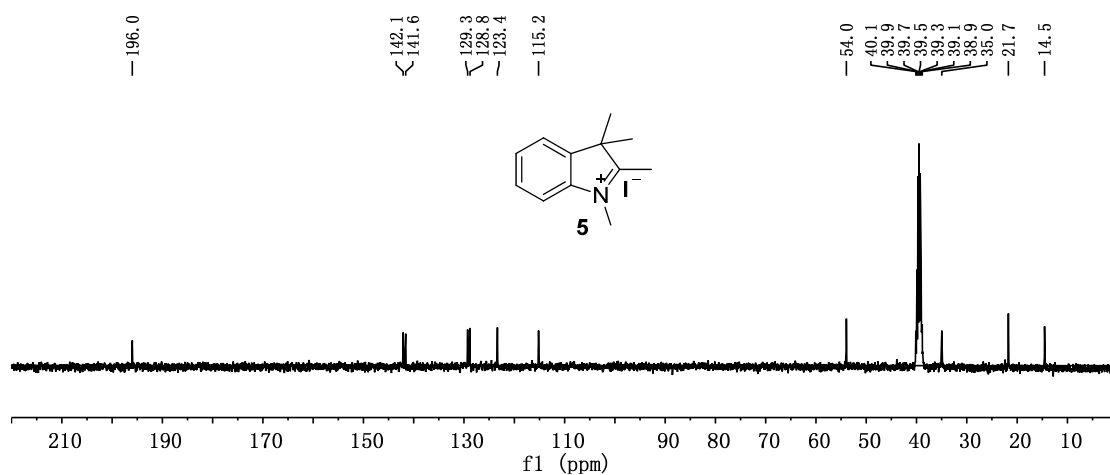

Fig. S9  $^1\text{H}$  NMR and  $^{13}\text{C}$  NMR spectra of compound **5** recorded in  $\text{DMSO-d}_6$ .

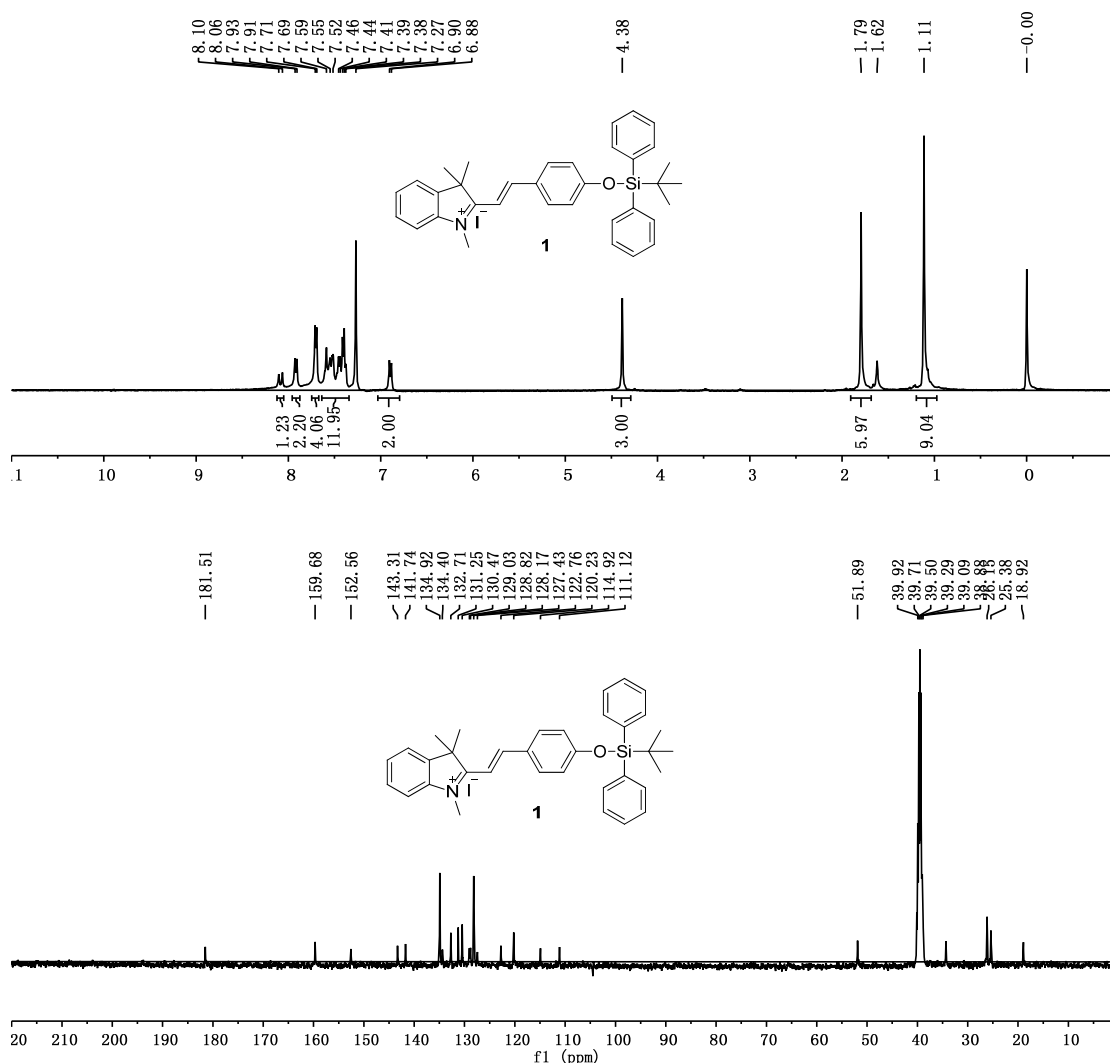

**Fig. S10** <sup>1</sup>H NMR and <sup>13</sup>C NMR spectra of compound **1** recorded in CDCl<sub>3</sub> and DMSO-d<sub>6</sub>, respectively.

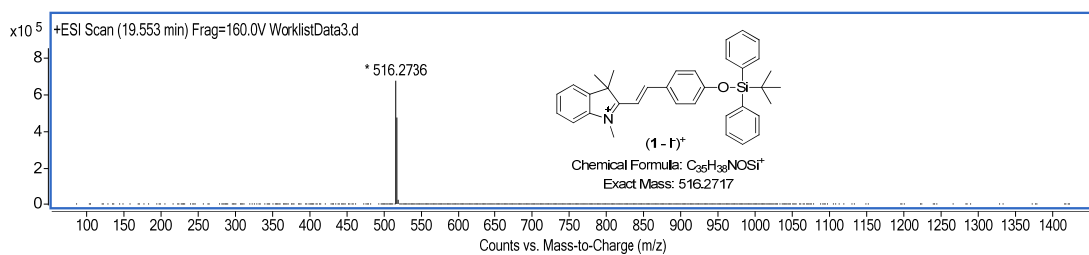

**Fig. S11** HR-MS spectrum of chemodosimeter **1**
